# Supplementary material for: Discovery of monocarbonyl curcumin-BTP hybrids as STAT3 inhibitors for drug-sensitive and drug-resistant breast cancer therapy
Source: PubMed Central journal article supplement (PMC5387716; doi:10.1038/srep46352), 2017-04-11

Discovery of monocarbonyl curcumin-BTP hybrids as STAT3 inhibitors  
for drug-sensitive and drug-resistant breast cancer therapy

Wenda Zhang, Jianpeng Guo, Shanshan Li, Ting Ma, Dingqiao Xu, Chao Han, Feiyan  
Liu, Wenying Yu\* & Lingyi Kong\*

State Key Laboratory of Natural Medicines, Department of Natural Medicinal  
Chemistry, China Pharmaceutical University, 24 Tong Jia Xiang, Nanjing 210009,  
People' s Republic of China

\* Corresponding Authors. Tel/Fax: +86-25-83271405; E-mail: cpu\_lykong@126.com  
(Lingyi Kong); ywy@cpu.edu.cn (Wenying Yu).

**Contents**

**Scheme1.**Synthesis of the new curcumin-BTP hybrids

**S1.**The <sup>1</sup>H NMR spectrums of representative compounds

## S1.Synthesis of the new curcumin-BTP hybrids

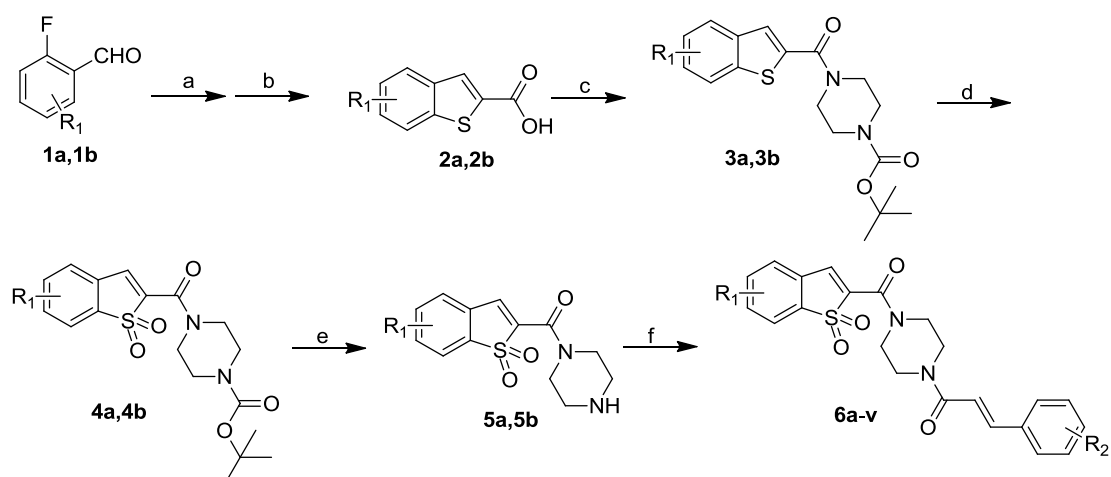

Reagents and conditions: (a) HSCH<sub>2</sub>COOCH<sub>3</sub>, DMF, 60 °C, 16h; (b) 10% KOH, reflux, 3 h, 1 M HCl; (c) SO<sub>2</sub>Cl, reflux; Et<sub>3</sub>N, overnight; (d) m-CPBA, DCM, reflux, 8h; (e) HCl gas in MeOH, rt, 48 h; (f) HATU, Et<sub>3</sub>N, DCM, rt, overnight.

Reagents and conditions: (a) HSCH<sub>2</sub>COOCH<sub>3</sub>, DMF, 60 °C, 16h; (b) 10% KOH, reflux, 3 h, 1 M HCl; (c) SO<sub>2</sub>Cl, reflux; Et<sub>3</sub>N, DCM, 0 °C, overnight; (d) m-CPBA, DCM, reflux, 8h; (e) HCl gas in MeOH, rt, 48 h; (f) HATU, Et<sub>3</sub>N, DCM, rt, overnight.

## S2.The <sup>1</sup>H NMR spectrums of representative compounds

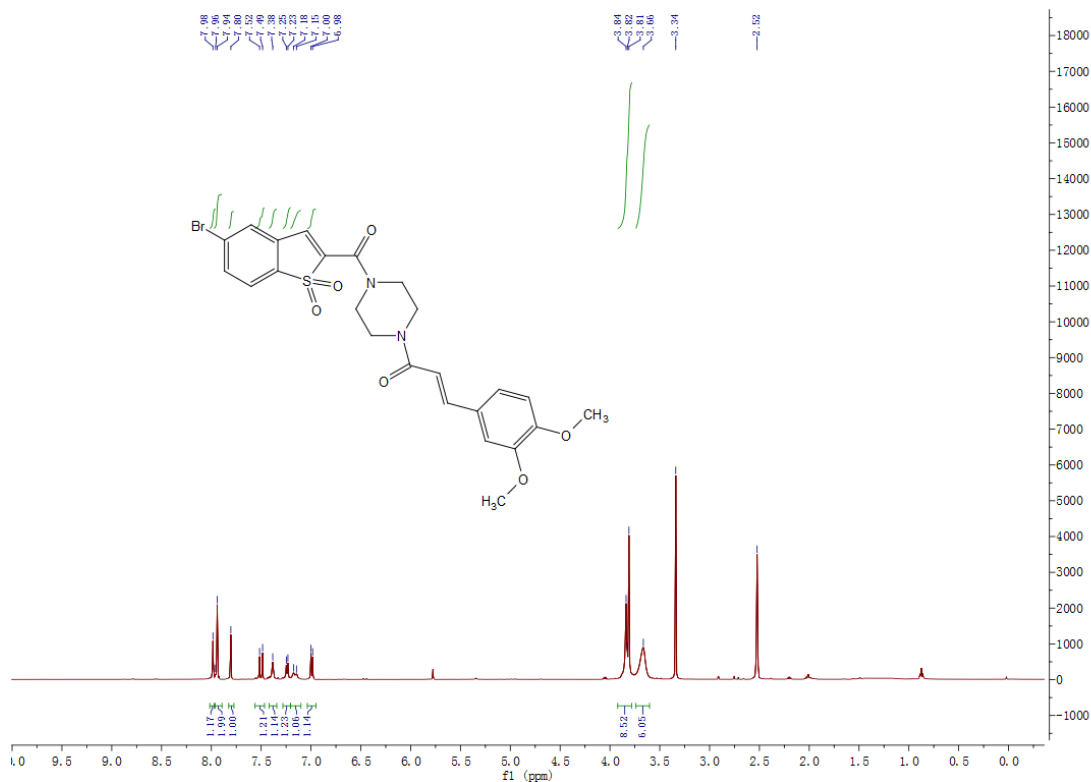

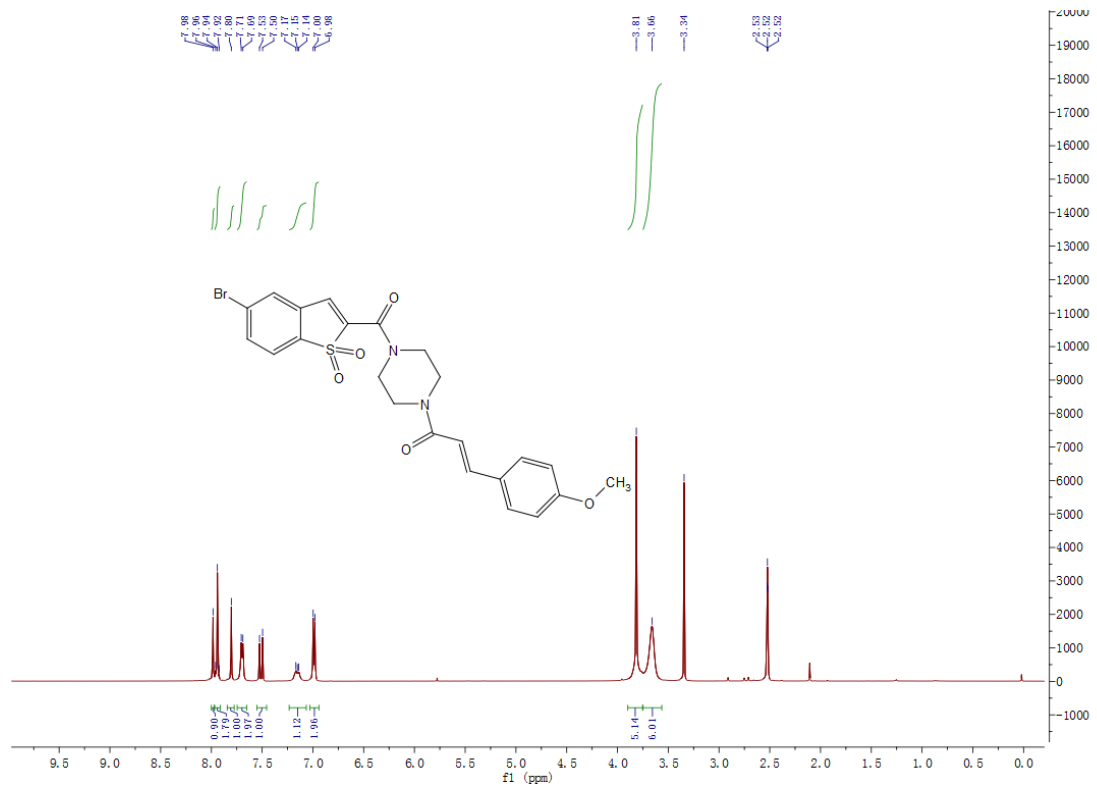

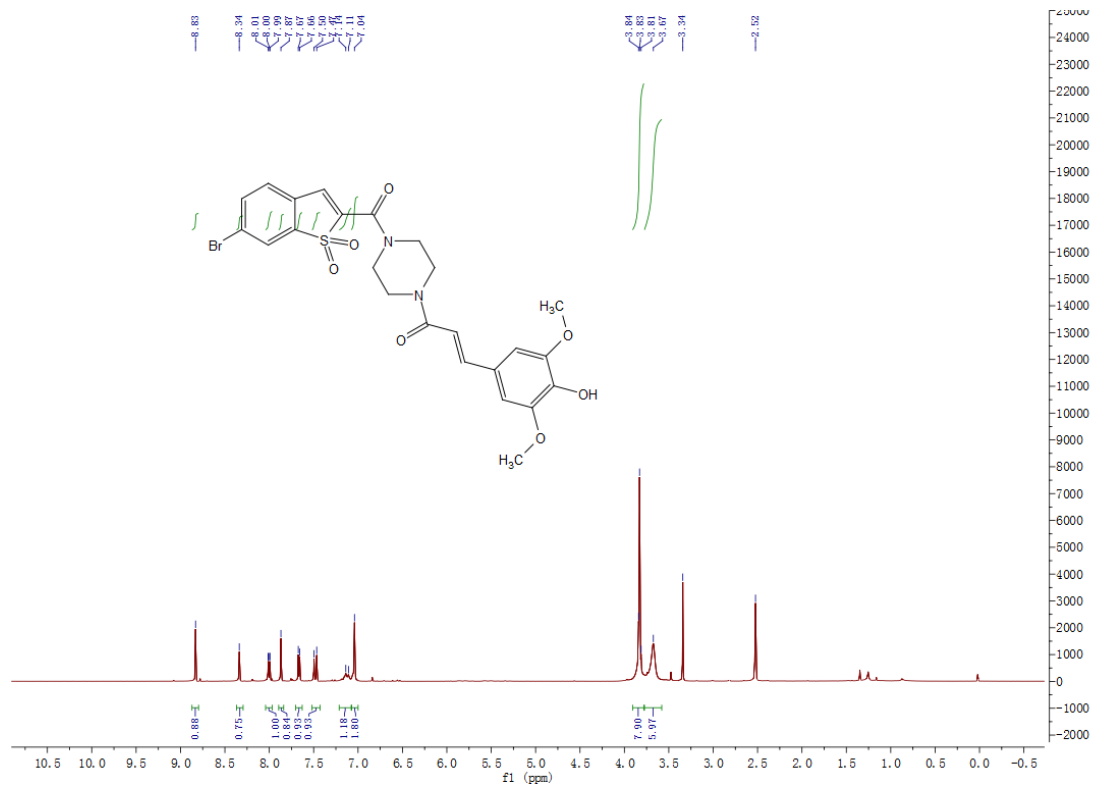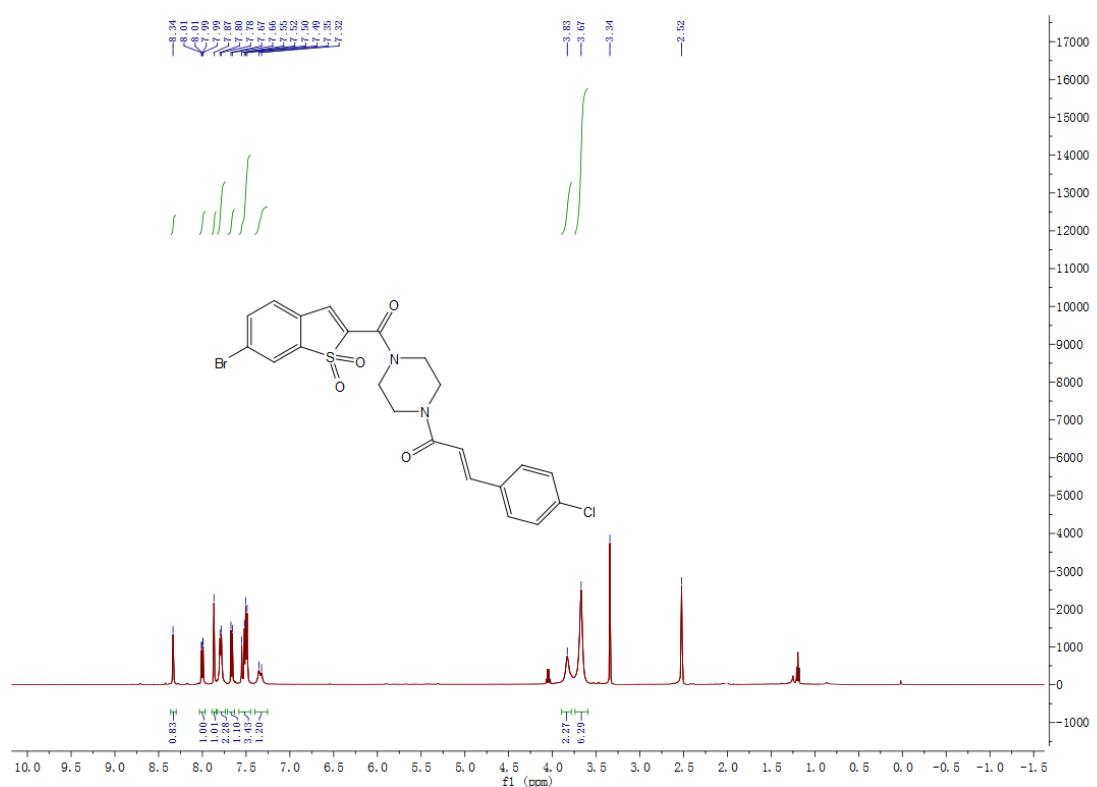

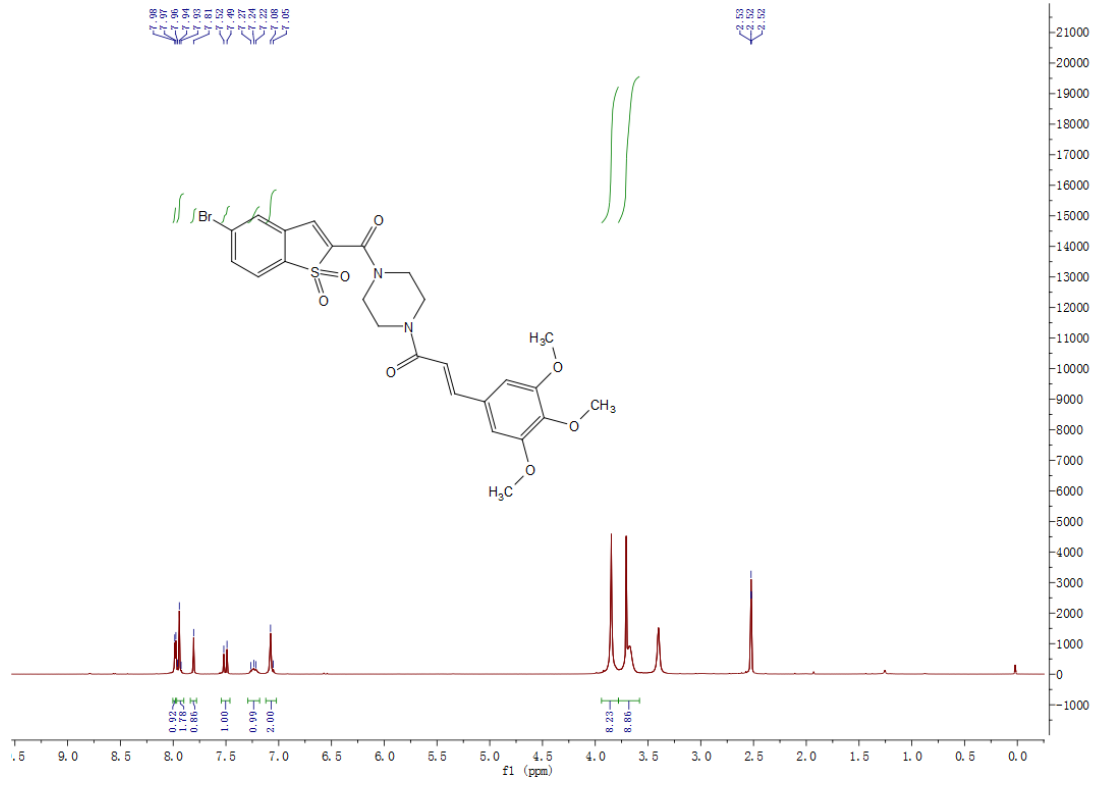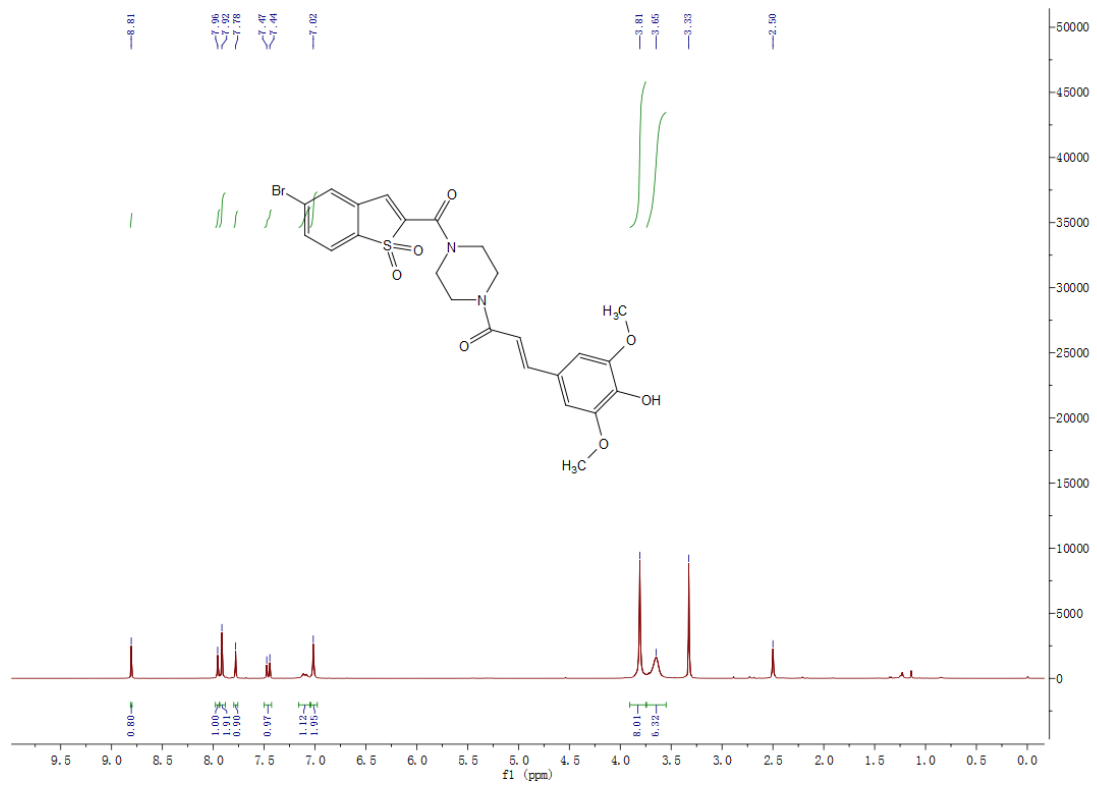

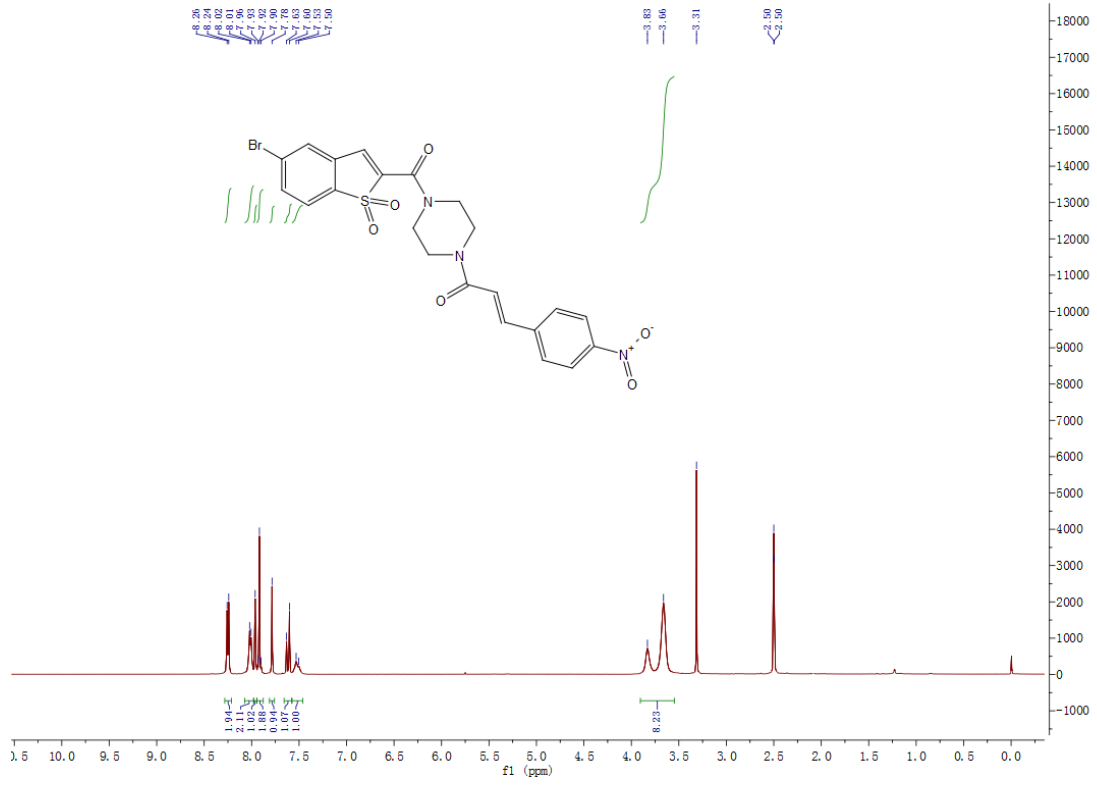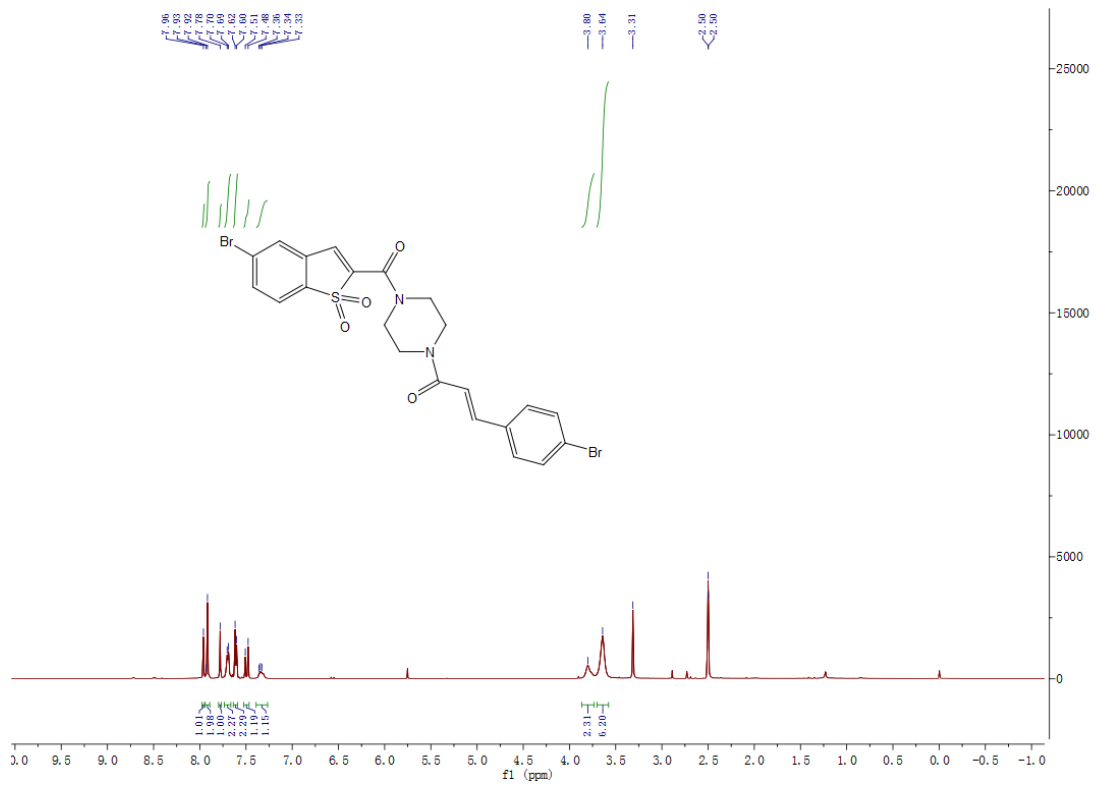

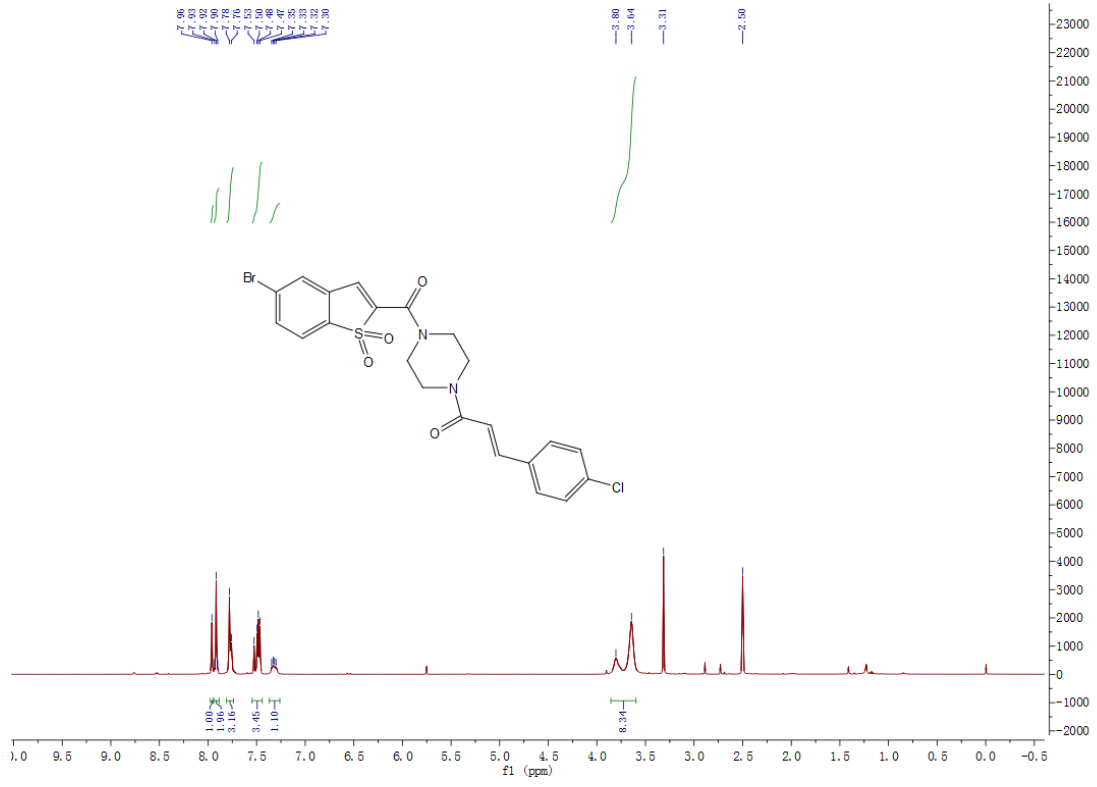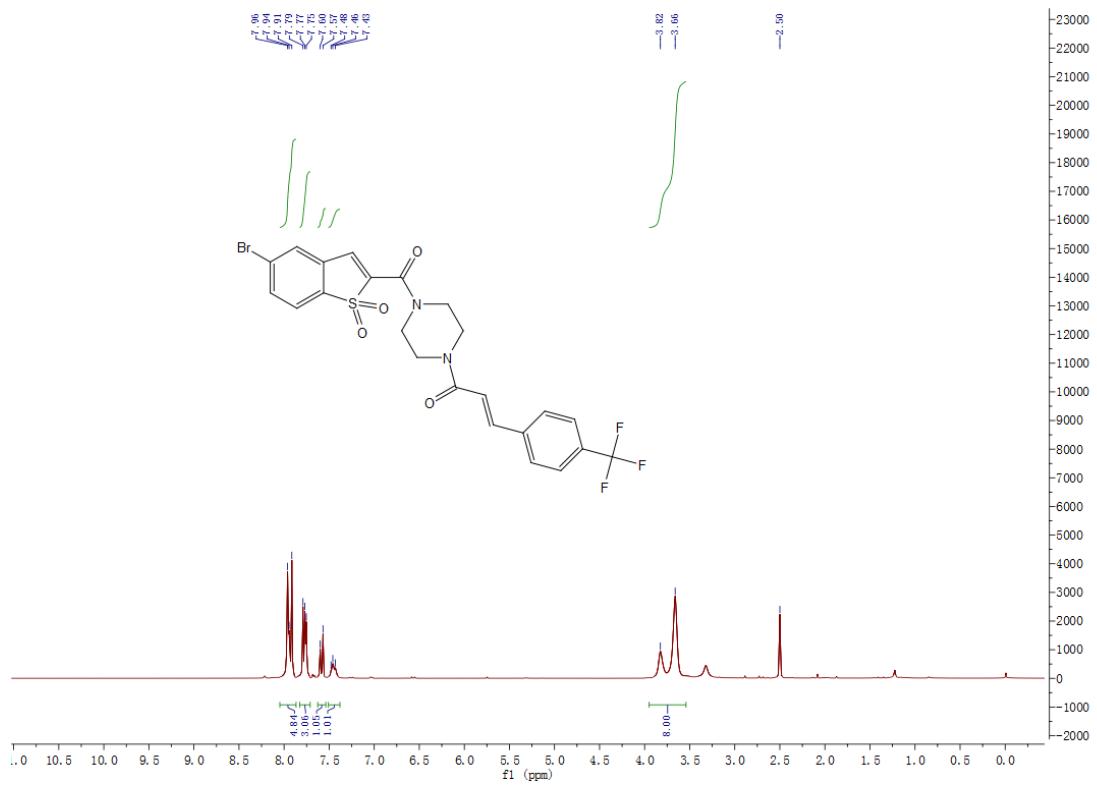

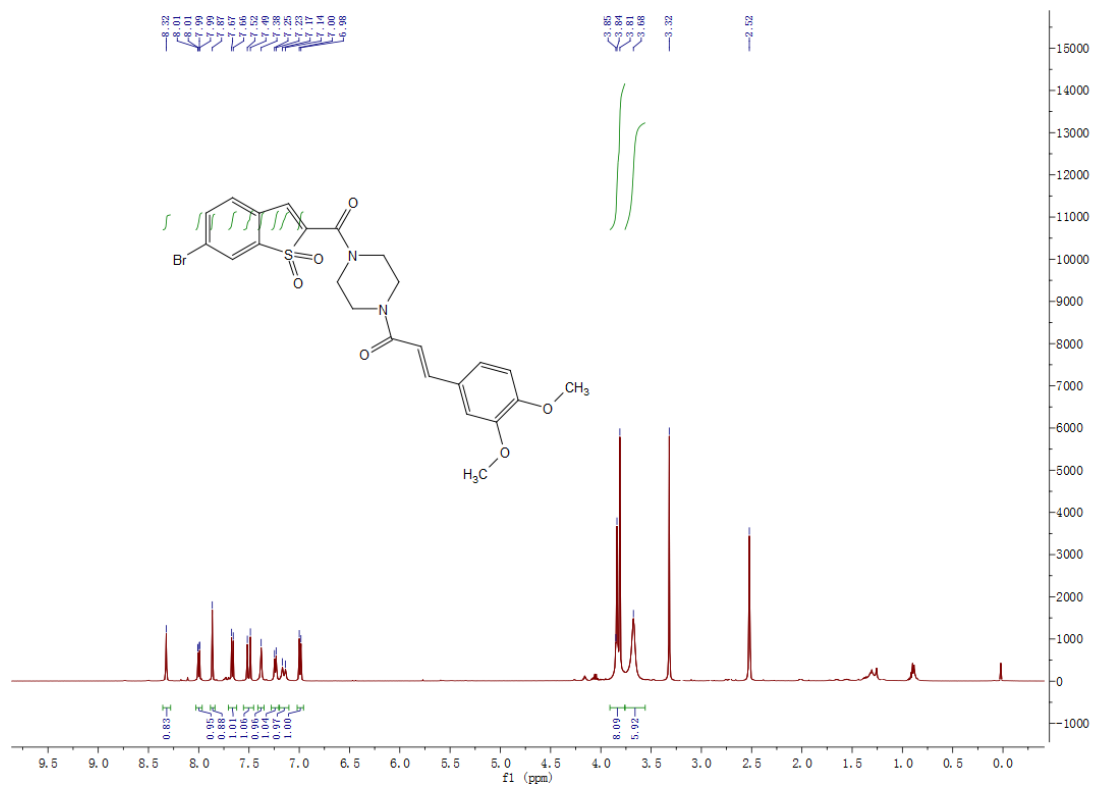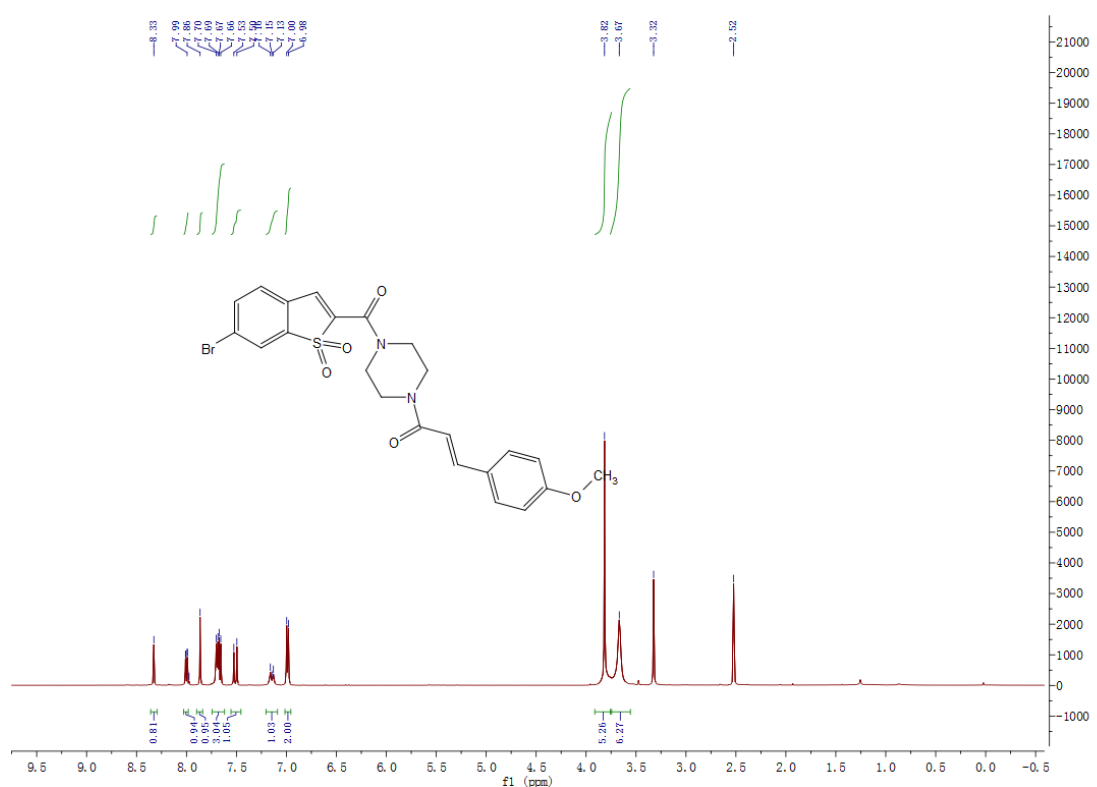



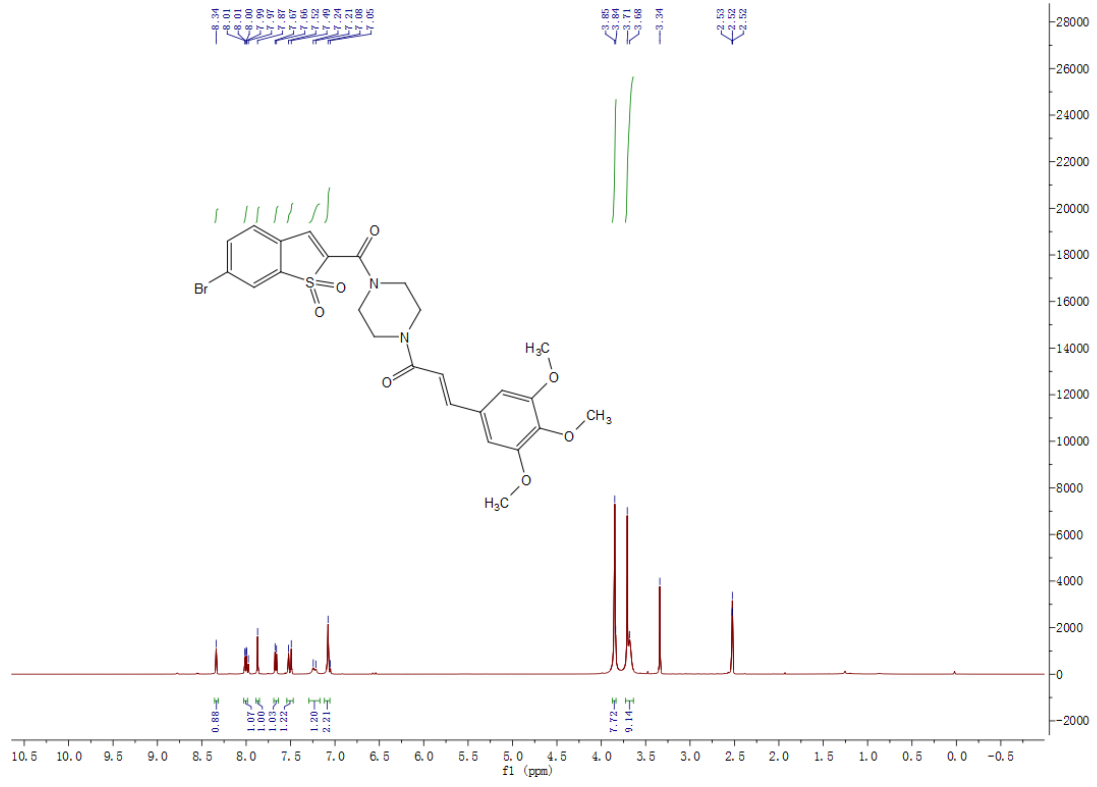

Supplement: srep46352-s1.pdf [file srep46352-s1.pdf]
